# Supplementary material for: Stepwise synthesis of siloxane chainsElectronic supplementary information (ESI) available: experimental details. See http://www.rsc.org/suppdata/cc/b3/b310472a/
Source: Royal Society of Chemistry journal article supplement (doi:10.1039/b310472a), 2004-01-01
Supplement: b310472a.doc [file b310472a.doc]

**Supplementary Information**

**(Bu*t*O)3SiOSi(CH3)2Cl II.** A tetrahydrofuran solution (20 ml) of tris(tertiary-butoxy)silanol (8.0 g, 30 mmol) and pyridine (2.4 g, 30 mmol) was slowly added to a stirring ice cooled solution (25 ml) of dichlorodimethylsilane (7.5 g, 58 mmol). The reaction mixture was slowly warmed to room temperature after addition and was stirred for 8 h. The pyridine hydrochloride white solid was filtrated and washed with 150 ml of tetrahydrofuran. The solvent was then removed from the filtrate in vacuo. Pentane was then added to the remaining liquid and the mixture was then filtered. Removal of pentane from the solution afforded 10.2 g of **II** in 94 wt.% yield. Elemental analysis found 46.68% C, 9.62% Cl, and 9.22% H (compared with theoretical 47.1% C, 10% Cl, and 9.3% H).

**(Bu*t*O)3SiOSi(CH3)2OSiPh2OH III.** To a stirred solution of diphenylsilanediol (12.5 g, 57 mmol) and pyridine (2.23 g, 29 mmol) in tetrahydrofuran (75 ml) was added a solution of **II** (10.0 g, 28 mmol) in tetrahydrofuran (30 ml) in an ice bath. The resulting reaction mixture was slowly warmed up to room temperature and further stirred overnight. The white pyridine hydrochloride solid was removed by filtration and washed, and the washed liquid was added to the filtrate. The combined filtrate was dried by evacuation. The solid product was extracted with pentane (50 ml) three times and the unreacted diphenylsilanediol solid was filtered out. 13.2 g of the product **wa**s obtained in 80 wt.% yield after removal of pentane in vacuo. Elemental analysis found 58.49% C and 8.07% H (compared with theoretical 58.3% C, and 8.2% H).

**(OtBu)3SiOSi(CH3)2OSiPh2OSi(CH3)2Cl IV.** At 0°C, 2.1 g (4 mmol) of **III** and 0.3 g (4 mmol) of pyridine in tetrahydrofuran (10ml) was added slowly to a vigorously stirred solution of dichlorodimethylsilane (0.95 g, 8 mmol) in 10 ml of tetrahydrofuran. The reaction mixture was warmed to room temperature and stirring was continued for 8 h. The pyridine hydrochloride was then separated by filtration and washed with 50 ml of tetrahydrofuran. After removal of the volatile material from the combined filtrate and extracts, pentane was then added to the remaining liquid and the mixture was then filtrated. 2.14 g of **IV** (95.5 wt.% yield) was obtained after removal of pentane from the solution. Elemental analysis found 54.65% C, 3.98% Cl, and 7.87% H (compared with theoretical 53.4% C, 5.7% Cl, and 7.8% H).

**(OtBu)3SiOSi(CH3)2OSiPh2OSi(CH3)2OSiPh2OH V.** Compound **V** was prepared by slowly adding a tetrahydrofuran (10 ml) solution of **IV** (2.14 g, 3.5 mmol) to the ice cooled stirring solution of diphenylsilanediol (1.5 g, 6.9 mmol) and pyridine (0.28 g, 3.5 mmol) in tetrahydrofuran (10 ml). After separation of pyridine hydrochloride from the solution, the solvent was removed in vacuo, leaving a wet-looking white solid. Extraction of **V** with pentane and separation of unreacted diphenylsilanediol from the solution gave a clear solution. Removal of pentane in vacuo produced 2.47 g of **V** (89.8 wt.% yield). Elemental analysis found 58.07% C and 7.23% H (compared with theoretical 59.4% C, and 7.4% H).
